# Supplementary material for: Leaving the Dark Side? Insights Into the Evolution of Luciferases
Source: Frontiers journal article supplement (doi:10.3389/fmars.2021.673620), 2021-06-30
Supplement: Data_Sheet_1.DOCX [file Data_Sheet_1.DOCX]

Aghamaali, M.R., Jafarian, V., Sariri, R., Molakarimi, M., Rasti, B., Taghdir, M., Sajedi, R.H. and Hosseinkhani, S. (2011). Cloning, sequencing, expression and structural investigation of mnemiopsin from *Mnemiopsis leidyi*: an attempt toward understanding Ca2+-regulated photoproteins. *Protein J*. 30(8), 566-574. <https://doi.org/10.1007/s10930-011-9363-8>

Alipour, B.S., Hosseinkhani, S., Nikkhah, M., Naderi-Manesh, H., Chaichi, M.J. and Osaloo, S.K. (2004). Molecular cloning, sequence analysis, and expression of a cDNA encoding the luciferase from the glow-worm, *Lampyris turkestanicus*. *Biochem. Biophys. Res. Commun*. 325(1), 215-222. <https://doi.org/10.1016/j.bbrc.2004.10.022>

Amaral, D.T., Prado, R.A. and Viviani, V.R. (2012). Luciferase from *Fulgeochlizus bruchi* (Coleoptera: Elateridae), a Brazilian click-beetle with a single abdominal lantern: molecular evolution, biological function and comparison with other click-beetle luciferases. *Photochem. Photobiol. Sci*. 11(7), 1259-1267. <https://doi.org/10.1039/C2PP25037C>

Ast, J.C. and Dunlap, P.V. (2004). Phylogenetic analysis of the *lux* operon distinguishes two evolutionarily distinct clades of *Photobacterium leiognathi. Arch. Microbiol*. 181, 352-361. <https://doi.org/10.1007/s00203-004-0663-7>

Ast, J.C. and Dunlap, P.V. (2005). Phylogenetic resolution and habitat specificity of members of the *Photobacterium phosphoreum* species group. *Environ. Microbiol*. 7(10), 1641-1654. <https://doi.org/10.1111/j.1462-2920.2005.00859.x>

Ast, J.C., Cleenwerck, I., Engelbeen, K., Urbanczyk, H., Thompson, F.L., De Vos, P. and Dunlap, P.V. (2007). *Photobacterium kishitanii* sp. nov., a luminous marine bacterium symbiotic with deep-sea fishes. *Int. J. Syst. Evol. Microbiol*. 57(9), 2073-2078. <https://doi.org/10.1099/ijs.0.65153-0>

Bessho-Uehara, M., Konishi, K. and Oba, Y. (2017). Biochemical characteristics and gene expression profiles of two paralogous luciferases from the Japanese firefly *Pyrocoelia atripennis* (Coleoptera, Lampyridae, Lampyrinae): insight into the evolution of firefly luciferase genes. *Photochem. Photobiol. Sci*. 16(8), 1301-1310. <https://doi.org/10.1039/C7PP00110J>

Bessho-Uehara, M. and Oba, Y. (2017). Identification and characterization of the Luc2-type luciferase in the Japanese firefly, *Luciola parvula*, involved in a dim luminescence in immobile stages. *Luminescence*. 32(6), 924-931. <https://doi.org/10.1002/bio.3273>

Bessho-Uehara, M., Francis, W.R. and Haddock, S.H.D. (2020a). Biochemical characterization of diverse deep-sea anthozoan bioluminescence system. *Mar. Biol*. 167, 114. <https://doi.org/10.1007/s00227-020-03706-w>

Bessho-Uehara, M., Huang, W., Patry, W.L., Browne, W.E., Weng, J.-K. and Haddock, S.H.D. (2020b). Evidence for *de novo* biosynthesis of the luminous substrate coelenterazine in ctenophores. *iScience*. 23(12), 101859. <https://doi.org/10.1016/j.isci.2020.101859>

Bessho-Uehara, M., Yamamoto, N., Shigenobu, S., Mori, H., Kuwata, K. and Oba, Y. (2020c). Kleptoprotein bioluminescence: *Paraprianthus* fish obtain luciferase from ostracod prey. *Sci. Adv*. 6(2), eaax4942. <https://doi.org/10.1126/sciadv.aax4942>

Bitler, B. and McElroy, W.D. (1957). The preparation and properties of crystalline firefly luciferin. *Arch. Biochem. Biophys*. 72, 358-368. <https://doi.org/10.1016/0003-9861(57)90212-6>

Borisova, V.V., Frank, L.A., Markova, S.V., Burakova, L.P. and Vysotski, E.S. (2008). Recombinant *Metridia* luciferase isoforms: expression, refolding and applicability for *in vitro* assay. *Photochem. Photobiol. Sci*. 7(9), 1025-1031. <https://doi.org/10.1039/B807271J>

Branchini, B.R., Southworth, T.L., DeAngelis, J.P., Roda, A. and Michelini, E. (2006). Luciferase from the Italian firefly *Luciola italica*: molecular cloning and expression. *Comp. Biochem. Physiol. B, Biochem. Mol. Biol*. 145(2), 159-167. <https://doi.org/10.1016/j.cbpb.2006.06.001>

Branchini, B.R., Behney, C.E., Southworth, T.L., Rawat, R. and Deheyn, D.D. (2014). Chemical analysis of the luminous slime secreted by the marine worm *Chaetopterus* (Annelida, Polychaeta). *Photochem. Photobiol.* 90, 247–251. <https://doi.org/10.1111/php.12169>

Branchini, B.R., Southworth, T.L., Fontaine, D.M., Murtiashaw, M.H., McGurk, A., Talukder, M.H., Qureshi, R., Yetil, D., Sundlov, J.A. and Gulick, A.M. (2016a). Cloning of the orange light-producing luciferase from *Photinus scintillans* – A new proposal on how bioluminescence color is determined. *Photochem. Photobiol*. 93(2), 479-485. <https://doi.org/10.1111/php.12671>

Branchini, B.R., Southworth, T.L., Salituro, L.J., Fontaine, D.M. and Oba, Y. (2016b). Cloning of the blue ghost (*Phausis reticulata*) luciferase reveals a glowing source of green light. *Photochem. Photobiol*. 93(2), 473-478. <https://doi.org/10.1111/php.12649>

Bryan, B.J. and Sent-Gyorgyi, C.S. (1999). Luciferases, fluorescent proteins, nucleic acids encoding the luciferases and fluorescent proteins and the use thereof in diagnostics, high throughput screening and novelty items. *International Pub.* No. WO 99/49019

Burakova, L.P., Natashin, P.V., Markova, S.V., Eremeeva, E.V., Malikova, N.P., Cheng, C., Liu, Z.-J. and Vysotski, E.S. (2016). Mitrocomin from the jellyfish *Mitrocoma cellularia* with deleted C-terminal tyrosine reveals a higher bioluminescence activity compared to wild type photoprotein. *J. Photochem. Photobiol. B*. 162, 286-297. <https://doi.org/10.1016/j.jphotobiol.2016.06.054>

Campbell, A.K. and Herring, P.J. (1990). Imidazolopyrazine bioluminescence in copepods and other marine organisms. *Mar. Biol*. 104, 219-225. <https://doi.org/10.1007/BF01313261>

Carrasco-Lopez, C., Ferreira, J., Lui, N.M., Schramm, S., Berraud-Pache, R., Navizet, I., Panjikar, S., Naumov, P. and Rabeh, W.M. (2018). Beetle luciferases with naturally red- and blue-shifted emission. *Life Sci. Alliance*. 1(4). <https://doi.org/10.26508/lsa.201800072>

Choi, Y.S., Lee, K.S., Bae, J.S., Lee, K.M., Kim, S.R., Kim, I., Lee, S.M., Sohn, H.D. and Jin, B.R. (2002). Molecular cloning and expression of a cDNA encoding the luciferase from the firefly, *Hoturia unmunsana*. *Comp. Biochem. Physiol. B, Biochem. Mol. Biol*. 132(3), 661-670. <https://doi.org/10.1016/S1096-4959(02)00085-4>

Choi, Y.S., Bae, J.S., Lee, K.S., Kim, S.R., Kim, I., Kim, J.G., Kim, K.Y., Kim, S.E., Suzuki, H., Lee, S.M., Sohn, H.D. and Jin, B.R. (2003). Genomic structure of the luciferase gene and phylogenetic analysis in the *Hoturia*-group fireflies. *Comp. Biochem. Physiol. B, Biochem. Mol. Biol*. 134(2), 199-214. <https://doi.org/10.1016/S1096-4959(02)00249-X>

Cohn, D.H., Mileham, A.J., Simon, M.I., Nealson, K.H., Rausch, S.K., Bonam, D. and Baldwin, T.O. (1985). Nucleotide sequence of the *luxA* gene of *Vibrio harveyi* and the complete amino acid sequence of the alpha subunit of bacterial luciferase. *J. Biol. Chem*. 260, 6139-6146.

Cormier, M.J. and Dure, L.S. (1963). Studies on the bioluminescence of *Balanoglossus biminiensis* extract I. Requirement for hydrogen peroxide and characteristics of the system. *J. Biol. Chem.* 238, 785–789.

Day, J.C., Chaichi, M.J., Najafil, I. and Whiteley, A.S. (2006). Genomic structure of the luciferase gene from the bioluminescent beetle, *Nyctophila* cf. *caucasia*. *J. Insect Sci*. 6(1), 37. <https://doi.org/10.1673/031.006.3701>

Day, J.C., Goodall, T.I. and Bailey, M.J. (2009). The evolution of the adenylate-forming protein family in beetles: multiple luciferase gene paralogues in fireflies and glow-worms. *Mol. Phylogenetics Evol*. 50(1), 93-101. <https://doi.org/10.1016/j.ympev.2008.09.026>

de Wet J.R., Wood, K.V., Helinski, D.R. and DeLuca, M. (1985). Cloning of firefly luciferase cDNA and the expression of active luciferase in *Escherichia coli*. *Proc. Natl. Acad. Sci. U. S. A*. 82(23), 7870-7873. <https://doi.org/10.1073/pnas.82.23.7870>

de Wet J.R., Wood, K.V., DeLuca, M., Helinski, D.R. and Subramani, S. (1987). Firefly luciferase gene: structure and expression in mammalian cells. *Mol. Cell. Biol*. 7(2), 725-737. <https://doi.org/10.1128/MCB.7.2.725>

Deheyn, D.D. and Latz, MI. (2009). Internal and secreted bioluminescence of the marine polychaete *Odontosyllis phosphorea* (Syllidae). *Invertebr. Biol.* 128, 31-45. <https://doi.org/10.1111/j.1744-7410.2008.00149.x>

Delroisse, J., Ullrich-Lüter, E., Blaue, S., Ortega-Martinez, O., Eeckhaut, I., Flammang, P. and Mallefet, J. (2017). A puzzling homology: a brittle star using a putative cnidarian-type luciferase for bioluminescence. *Open Biol*. 7(4), 160300. <https://doi.org/10.1098/rsob.160300>

Deng, L., Vysotski, E.S., Markova, S.V., Liu, Z.-J., Lee, J., Rose, J. and Wang, B.-C. (2009). All three Ca2+-binding loops of photoproteins bind calcium ions: the crystal structures of calcium-loaded apo-aequorin and apo-obelin. *Protein Sci*. 14(3), 663-675. <https://doi.org/10.1110/ps.041142905>

Devine, J.H., Kutuzova, G.D., Green, V.A., Ugarova, N.N. and Baldwin, T.O. (1993). Luciferase from the East European firefly *Luciola mingrelica*: cloning and nucleotide sequence of the cDNA, overexpression in *Escherichia coli* and purification of the enzyme. *BBA-Gene Struct. Expr*. 1173(2), 121-132. <https://doi.org/10.1016/0167-4781(93)90172-A>

Dong, P.-X., Hou, Q.-B., Li, X.-Y. and Liang, X.-C. (2008). Cloning, expression and sequence analysis of a luciferase gene from the Chinese firefly *Pyrocoelia pygidialis*. *Zool. Res*. 29(5), 477-484.

Duchatelet, L., Hermans, C., Duhamel, G., Cherel, Y. and Mallefet, J. (2019). Coelenterazine detection in five myctophid species from the Kerguelen Plateau. D. Welsford, J. Dell, G. Duhamel (Eds.), *The Kerguelen Plateau: Marine Ecosystem and Fisheries. Proceedings of the Second Symposium*, Australian Antartic Division, Kingston (2019), pp. 31-41

Dunlap, J.C., Hastings, J.W. and Shimomura, O. (1980). Crossreactivity between the light-emitting systems of distantly related organisms: novel type of light-emitting compound. *Proc. Natl. Acad. Sci. U. S. A*. 77(3), 1394-1397. <https://doi.org/10.1073/pnas.77.3.1394>

Dunlap, J.C. and Hastings, J.W. (1981). Biochemistry of dinoflagellate bioluminescence: the purification and characterization of dinoflagellate luciferin from *Pyrocystis lunula*. *Biochemistry.* 20(4), 983-989. <https://doi.org/10.1021/bi00507a052>

Dunlap, J.C., Hastings, J.W. and Shimomura, O. (1981). Dinoflagellate luciferin is structurally related to chlorophyll. *FEBS Lett.* 135(2), 273-276. <https://doi.org/10.1016/0014-5793(81)80799-5>

Dunlap, P.V. and Kita-Tsukamoto, K. (2006). Luminous bacteria. *Prokaryotes*. 2, 863-892. <https://doi.org/10.1007/0-387-30742-7_27>

Dunstan, S.L., Sala-Newby, G.B., Fajardo, A.B., Taylor, K.M. and Campbell, A.K. (2000). Cloning and expression of the bioluminescent photoprotein pholasin from the bivalve mollusk *Pholas dactylus*. *J. Biol. Chem*. 275, 9403-9409. <https://doi.org/10.1074/jbc.275.13.9403>

Emamzadeh, A.R., Hosseinkhani, S., Sadeghizadeh, M., Nikkhah, M., Chaichi, M.J. and Mortazavi, M. (2006). cDNA cloning, expression and homology modeling of a luciferase from the firefly *Lampyroidea maculata*. *J. Biochem. Mol. Biol*. 39(5), 578-585. <https://doi.org/10.5483/bmbrep.2006.39.5.578>

Fagan, T.F., Ohmiya, Y., Blinks, J.R., Inouye, S. and Tsuji, F.I. (1993). Cloning, expression and sequence analysis of cDNA for the Ca2+-binding photoprotein, mitrocomin. *FEBS lett*. 333(3), 301-305. <https://doi.org/10.1016/0014-5793(93)80675-K>

Falaschi, R.L., Amaral, D.T., Santos, I., Domingos, A.H.R., Johnson, G.A., Martins, A.G.S., Viroomal, I.B., Pompéia, S.L., Mirza, J.D., Oliveira, A.G., Bechara, E.J.H., Viviani, V.R. and Stevani, C.V. (2019). *Neoceroplatus betaryiensis* nov. sp. (Diptera: Keroplatidae) is the first record of bioluminescent fungus-gnat in South America. *Sci. Rep*. 9, 11291. <https://doi.org/10.1038/s41598-019-47753-w>

Fourrage, C., Swann, K., Gonzalez Garcia, J.R., Campbell, A.K. and Houliston, E. (2014). An endogenous green fluorescent protein–photoprotein pair in *Clytia hemisphaerica* eggs shows co-targeting to mitochondria and efficient bioluminescence energy transfer. *Open Biol*. 4(4), 130206. <https://doi.org/10.1098/rsob.130206>

Francis, W.R., Christianson, L.M. and Haddock, S.H.D. (2017). Symplectin evolved from multiple duplications in bioluminescent squid. *PeerJ*. 5, e3633. <https://doi.org/10.7717/peerj.3633>

Frank, T.M., Widder, E.A., Latz, M.I. and Case, J.F. (1984). Dietary maintenance of bioluminescence in a deep-sea mysid. *J. Exp. Biol*. 109, 385-389.

Fujii, T., Ahn, J.-Y., Kuse, M., Mori, H., Matsuda, T. and Isobe, M. (2002). A novel photoprotein from oceanic squid (*Symplectoteuthis oualaniensis*) with sequence similarity to mammalian carbon-nitrogen hydrolase domains. *Biochem. Biophys. Res. Commun*. 293(2), 874-879. <https://doi.org/10.1016/S0006-291X(02)00296-6>

Galeazzo, G.A., Mirza, J.D., Dorr, F.A., Pinto, E., Stevani, C.V., Lohrmann, K.B. and Oliveira, A.G. (2019). Characterizing the bioluminescence of the Humboldt squid, *Dosidicus gigas* (d’Orbigny, 1835): One of the largest luminescent animals in the world. *Photochem. Photobiol*. 95(5), 1179-1185. <https://doi.org/10.1111/php.13106>

Gimenez, G., Metcalf, P., Paterson, N.G. and Sharpe, M.L. (2016). Mass spectrometry analysis and transcriptome sequencing reveal glowing squid crystal proteins are in the same superfamily as firefly luciferase. *Sci. Rep*. 6, 27638. <https://doi.org/10.1038/srep27638>

Green, A.A. and McElroy, W.D. (1956). Crystalline firefly luciferase. *BBA*. 20, 170-176. <https://doi.org/10.1016/0006-3002(56)90275-X>

Gurskaya, N.G., Fradkov, A.F., Pounkova, N.I., Staroverov, D.B., Bulina, M.E., Yanushevich, Y.G., Labas, Y.A., Lukyanov, S. and Lukyanov, K.A. (2003). A colourless green fluorescent protein homologue from the non-fluorescent hydromedusa *Aequorea coerulescens* and its fluorescent mutants. *Biochem. J*. 373(2), 403-408. <https://doi.org/10.1042/bj20021966>

Haddock, S.H.D., Rivers, T.J. and Robison, B.H. (2001). Can coelenterates make coelenterazine? Dietary requirement for luciferin in cnidarian bioluminescence. *Proc. Natl. Acad. Sci. U. S. A*. 98(20), 11148-11151. <https://doi.org/10.1073/pnas.201329798>

Hendry, T.A., de Wet, J.R. and Dunlap, P.V. (2013). Genomic signatures of obligate host dependence in the luminous bacterial symbiont of a vertebrate. *Environ. Microbiol*. 16(8), 2611-2622. <https://doi.org/10.1111/1462-2920.12302>

Hendry, T.A. and Dunlap, P.V. (2014). Phylogenetic divergence between the obligate luminous symbionts of flashlight fishes demonstrates specificity of bacteria to host genera. *Environ. Microbiol. Rep*. 6(4), 331-338. <https://doi.org/10.1111/1758-2229.12135>

Hendry, T.A., Freed, L.L., Fader, D., Fenolio, D., Sutton, T.T. and Lopez, J.V. (2018). Ongoing transposon-mediated genome reduction in the luminous bacterial symbionts of deep-sea Ceratioid anglerfishes. *mBio*. 9, 3. <https://doi.org/10.1128/mBio.01033-18>

Homaei, A.A., Mymandi, A.B., Sariri, R., Kamrani, E., Stevanato, R., Etezad, S.-M. and Khajed, K. (2013). Purification and characterization of a novel thermostable luciferase from *Benthosema pterotum*. *J. Photochem. Photobiol. B*. 125, 131-136. <https://doi.org/10.1016/j.jphotobiol.2013.05.015>

Hori, K., Charbonneau, H., Hart, R.C. and Cormier, MJ. (1977). Structure of native *Renilla reniformis* luciferin. *Proc. Natl Acad. Sci. U. S. A*. 74(10), 4285-4287. <https://doi.org/10.1073/pnas.74.10.4285>

Illarionov, B.A., Protopopova, M.V., Karginov, V.A., Mertvetsov, N.P. and Gitelson, J.I. (1988). Nucleotide sequence of part of *Photobacterium leiognathid lux* operon. *Nucleic Acids Res*. 16(20), 9855. <https://doi.org/10.1093/nar/16.20.9855>

Illarionov, B.A., Bondar, V.S., Illarionova, V.A. and Vysotski, E.S. (1995). Sequence of the cDNA encoding the Ca2+-activated photoprotein obelin from the hydroid polyp *Obelia longissima*. *Gene*. 153(2), 273-274. <https://doi.org/10.1016/0378-1119(94)00797-V>

Inoue, S., Kakoi, H. and Goto, T. (1976a). Squid bioluminescence III. Isolation and structure of *Watasenia* luciferin. *Tetrahedron Lett*. 17(34), 2971-2974. <https://doi.org/10.1016/S0040-4039(01)85503-9>

Inoue, S., Kakoi, H. and Goto, T. (1976b). *Oplophorus* luciferin, bioluminescent substance of the decapod shrimps, *Oplophorus spinosus* and *Heterocarpus laevigatus*. *J. Chem. Soc., Chem. Commun*. 24, 1056-1057. <https://doi.org/10.1039/C39760001056>

Inoue, S., Okada, K., Kakoi, H. and Goto, T. (1977). Fish bioluminescence I. Isolation of a luminescent substance from a *Myctophina* fish, *Neoscopelus microchir*, and identification of it as *Oplophorus* luciferin. *Chem. Lett*. 6(3), 257-258. <https://doi.org/10.1246/cl.1977.257>

Inoue, S., Kakoi, H., Okada, K. and Goto, T. (1979). Fish bioluminescence II. Trace characterization of the luminescence system of a Myctophina fish, *Diaphus elucens*. *Chem. Lett*. 8(3), 253-256. <https://doi.org/10.1246/cl.1979.253>

Inouye, S., Noguchi, M., Sakaki, Y., Takagi, Y., Miyata, T., Iwanaga, S., Miyata, T. and Fujii, F.I. (1985). Cloning and sequence analysis of cDNA for the luminescent protein aequorin. *Proc. Natl. Acad. Sci. U. S. A*. 82(10), 3154-3158. <https://doi.org/10.1073/pnas.82.10.3154>

Inouye, S., Watanabe, K., Nakamura, H. and Shimomura, O. (2000). Secretional luciferase of the luminous shrimp *Oplophorus gracilirostris*: cDNA cloning of a novel imidazopyrazinone luciferase. *FEBS Lett*. 481(1), 19-25. <https://doi.org/10.1016/S0014-5793(00)01963-3>

Inouye, S. (2008). Cloning, expression, purification and characterization of an isotype of clytin, a calcium-binding photoprotein from the luminous hydromedusa *Clytia gregarium*. *J. Biochem*. 143(5), 711-717. <https://doi.org/10.1093/jb/mvn024>

Ishida, Y., Meyer-Rochow, V.B. and Asano, Y. (2018). Comparison of DNA sequence encoding hydroxynitrile lyase from the invasive millipede, *Chamberlinius hualienensis*, collected at Kagoshima, Shizuoka, and Hachijojima, Tokyo. *Bull. Toyama Pref. Univ.* **28**, 35-40

Isobe, M., Fujii, T., Kuse, M., Miyamoto, K. and Koga, K. (2002). 19F-dehydrocoelenterazine as probe to investigate the active site of symplectin. *Tetrahedron*. 58(11), 2117-2126. <https://doi.org/10.1016/S0040-4020(02)00100-X>

Jafarian, V., Sariri, R., Hosseinkhani, S., Aghamaali, M.R., Sajedi, R.H., Taghdir, M. and Hassannia, S. (2011). A unique EF-hand motif in mnemiopsin photoprotein from *Mnemiopsis leidyi*: Implication for its low calcium sensitivity. *Biochem. Biophys. Res. Commun*. 413(2), 164-170. <https://doi.org/10.1016/j.bbrc.2011.08.022>

Johnson, F.H., Sugiyama, N., Shimomura, O., Saiga, Y. and Haneda, Y. (1961). Crystalline luciferin from a luminescent fish, *Parapriacanthus beryciformes*. *Proc. Natl. Acad. Sci. U. S. A*. 47(4), 486-489. <https://doi.org/10.1073/pnas.47.4.486>

Kanakubo, A., Koga, K., Isobe, M. and Yoza, K. (2005). Tetrabromohydroquinone and riboflavin are possibly responsible for green luminescence in the luminous acorn worm, *Ptychodera flava*. Luminescence. 20, 397-400. <https://doi.org/10.1002/bio.803>

Ke, H.-M., Lee, H.-H., Lin, C.-Y.I., Liu, M.R., Hsieh, J.-W.A., Chang, C.-C., Wu, P.-H., et al. (2020). *Mycena* genomes resolve the evolution of fungal bioluminescence. *BioRxiv*. <https://doi.org/10.1101/2020.05.06.079921>

Khrulnova, S.A., Manukhov, I.V., Zarubina, A.P. and Zavilgelsky, G.B. (2010). *Aliivibrio logei* KCh1 (Kamchatka isolate): biochemical and bioluminescence characteristics and cloning of the *lux* operon. *Microbiol*. 79, 349-355. <https://doi.org/10.1134/S0026261710030112>

Kim, J.G., Choi, Y.S., Kim, K.Y., Bae, J.S., Kim, I., Sohn, H.D. and Jin, B.R. (2004). Genomic structure and phylogenetic analysis of the luciferase gene of the firefly, *Luciola lateralis* (Coleoptera: Lampyridae). *Eur. J. Entomol*. 101, 1-11.

Kishi, T., Goto, T., Hirata, Y., Shimomura, O. and Johnson, F.H. (1966). *Cypridina* bioluminescence I structure of *Cypridina* luciferin. *Tetrahedron Lett*. 7(29), 3427-3436. <https://doi.org/10.1016/S0040-4039(01)82806-9>

Kishi, Y., Matsuura, S., Inoue, S., Shimomura, O. and Goto, T. (1968). Luciferin and luciopterin isolated from the Japanese firefly, *Luciola cruciate*. *Tetrahedron Lett*. 9(24), 2847-2850. <https://doi.org/10.1016/S0040-4039(00)75644-9>

Kotlobay, A.A., Sarkisyan, K.S., Mokrushina, Y.A., Marcet-Houben, M., Serebrovskaya, E.O., Markina, N.M., et al. (2018). Genetically encodable bioluminescent system from fungi. *Proc. Natl. Acad. Sci. U. S. A*. 115(50), 12728-12732. <https://doi.org/10.1073/pnas.1803615115>

Kotlobay, A.A., Dubinnyi, M.A., Purtov, K.V., et al. (2019) Bioluminescence chemistry of fireworm *Odontosyllis*. *Proc. Natl. Acad. Sci. U. S. A*. 116(38), 18911–18916. <https://doi.org/10.1073/pnas.1902095116>

Kuse, M., Tanaka, E. and Nishikawa, T. (2008). Pholasin luminescence is enhanced by addition of dehydrocoelenterazine. *Bioorg. Med. Chem. Lett*. 18(20), 5657-5659. <https://doi.org/10.1016/j.bmcl.2008.08.113>

Kuse, M. (2020). Marine bioluminescence with dehydrocoelenterazine, an imidazopyrazinone Compound. In: Topics in Heterocyclic Chemistry. Springer, Berlin, Heidelberg. <https://doi.org/10.1007/7081_2020_41>

Lee, K.S., Park, H.J., Bae, J.S., Goo, T.W., Kim, I., Sohn, H.D. and Jin, B.R. (2001). Molecular cloning and expression of a cDNA encoding the luciferase from the firefly, *Pyrocoelia rufa*. *J. Biotechnol*. 92(1), 9-19. <https://doi.org/10.1016/S0168-1656(01)00323-6>

Li, L., Hong, R. and Hastings, J.W. (1997). Three functional luciferase domains in a single polypeptide chain. *Proc. Natl. Acad. Sci. U. S. A*. 94(17), 8954-8958. <https://doi.org/10.1073/pnas.94.17.8954>

Li, X., Yang, S. and Liang, X. (2006). Phylogenetic relationship of the firefly, *Diaphanes pectinealis* (Insecta, Coleoptera, Lampyridae) based on DNA sequence and gene structure of luciferase. *Zool. Res*. 27(4), 367-374.

Li, X., Ogoh, K., Ohba, N., Liang, X. and Ohmiya, Y. (2007). Mitochondrial genomes of two luminous beetles, *Rhagophthalmus lufengensis* and *R. ohbai* (Arthropoda, Insecta, Coleoptera). *Gene*. 392(1-2), 196-205. <https://doi.org/10.1016/j.gene.2006.12.017>

Liu, G.-C., Dong, Z.-W., Hou, Q.-B., He, J.-W., Zhao, R.-P., Wang, W. and Li, X.-Y. (2019a). Second Rhagophthalmid luciferase cloned from Chinese glow-worm *Menghuoius giganteus* (Rhagophthalmidae: Elateroidea). *Photochem. Photobiol*. 96(1), 46-54. <https://doi.org/10.1111/php.13172>

Liu, G.-C., Zhang, R., Hou, Q.-B., He, J.-W., Dong, Z.-W., Zhao, R.-P., Wang, W. and Li, X.-Y. (2019b). Cloning and characterization of luciferase from the Chinese firefly *Lamprigera yunnana*. *Photochem. Photobiol*. 95(5), 1186-1194. <https://doi.org/10.1111/php.13109>

Liu, L., Wilson, T. and Hastings, J.W. (2004). Molecular evolution of dinoflagellate luciferases, enzymes with three catalytic domains in a single polypeptide. *Proc. Natl. Acad. Sci. U. S. A*. 101(47), 16555-16560. <https://doi.org/10.1073/pnas.0407597101>

Liu, L. and Hastings, J.W. (2007). Two different domains of the luciferase gene in the heterotrophic dinoflagellate *Noctiluca scintillans* occur as two separate genes in photosynthetic species. *Proc. Natl. Acad. Sci. U. S. A*. 104(3), 696-701. <https://doi.org/10.1073/pnas.0607816103>

Liu, Z.J., Vysotski, E.S., Deng, L., Lee, J., Rose, J. and Wang, B.-C. (2003). Atomic resolution structure of obelin: soaking with calcium enhances electron density of the second oxygen atom substituted at the C2-position of coelenterazine. *Biochem. Biophys. Res. Commun*.311(2), 433-439. <https://doi.org/10.1016/j.bbrc.2003.09.231>

Liu, Z.J., Stepanyuk, G.A., Vysotski, E.S., Lee, J., Markova, S.V., Malikova, N.P. and Wang, B.C. (2006). Crystal structure of obelin after Ca2+-triggered bioluminescence suggests neutral coelenteramide as the primary excited state. *Proc. Natl. Acad. Sci. U. S. A*. 103, 2570-2575. <https://doi.org/10.1073/pnas.0511142103>

Lorenz, W.W., McCann, R.O., Longiaru, M. and Cormier, M.J. (1991). Isolation and expression of a cDNA encoding *Renilla reniformis* luciferase. *Proc. Natl. Acad. Sci. U. S. A*. 88(10), 4438-4442. <https://doi.org/10.1073/pnas.88.10.4438>

Malikova, N.P., Visser, N.V., van Hoek, A., Skakun, V.V., Vysotski, E.S., Lee, J. and Visser, A.J.W.G. (2011). Green-fluorescent protein from the bioluminescent jellyfish *Clytia gregaria* is an obligate dimer and does not form a stable complex with the Ca2+-discharged photoprotein clytin. *Biochem*. 50, 4232-4241. <https://doi.org/10.1021/bi101671p>

Mallefet, J. and Shimomura, O. (1995). Presence of coelenterazine in mesopelagic fishes from the Strait of Messina. *Mar. Biol.* 124, 381-385. <https://doi.org/10.1007/BF00363911>

Mallefet, J., Duchatelet, L. and Coubris, C. (2020). Bioluminescence induction in the ophiuroid *Amphiura filiformis* (Echinodermata). *J. Exp. Biol*. 223, jeb218719. <https://doi.org/10.1242/jeb.218719>

Markova, S.V., Vysotski, E.S., Blinks, J.R., Burakova, L.P., Wang, B.C. and Lee, J. (2002). Obelin from the bioluminescent marine hydroid *Obelia geniculata*: cloning, expression, and comparison of some properties with those of other Ca2+-regulated photoproteins. *Biochem*. 41(7), 2227-2236. <https://doi.org/10.1021/bi0117910>

Markova, S.V., Golz, S., Frank, L.A., Kalthof, B. and Vysotski, E.S. (2003). Cloning and expression of cDNA for a luciferase from the marine copepod *Metridia longa* – a novel secreted bioluminescent reporter enzyme. *J. Biol. Chem*. 279, 3212-3217. <https://doi.org/10.1074/jbc.M309639200>

Markova, S.V., Burakova, L.P., Golz, S., Malikova, N.P., Frank, L.A. and Vysotski, E.S. (2012). The light-sensitive photoprotein berovin from the bioluminescent ctenophore *Beroe abyssicola*: a novel type of Ca2+-regulated photoprotein. *FEBS J*. 279(5), 856-870. <https://doi.org/10.1111/j.1742-4658.2012.08476.x>

Markova, S.V. and Vysotski, E.S. (2015). Coelenterazine-dependent luciferases. *Biochem*. 80, 714-732. <https://doi.org/10.1134/S0006297915060073>

Markova, S.V., Larionova, M.D. and Vysotski, E.S. (2018). Shining light on the secreted luciferases of marine copepods: current knowledge and applications. *Photochem. Photobiol*. 95(3), 705-721. <https://doi.org/10.1111/php.13077>

Matsui, D., Nakano, S., Dadashipour, M. and Asano, Y. (2017). Rational identification of aggregation hotspots based on secondary structure and amino acid hydrophobicity. *Sci. Rep*. 7, 9558. <https://doi.org/10.1038/s41598-017-09749-2>

Mitani, Y., Futahashi, R., Niwa, K., Ohba, N. and Ohmiya, Y. (2013). Cloning and characterization of luciferase from a Fijian luminous click beetle. *Photochem. Photobiol*. 89(5), 1163-1169. <https://doi.org/10.1111/php.12097>

Mitani, Y., Yasuno, R., Isaka, M., Mitsuda, N., Futahashi, R., Kamagata, Y., Ohmiya, Y. (2018). Novel gene encoding a unique luciferase from the fireworm *Odontsyllis undecimdonta*. *Sci. Rep*. 8, 12789. <https://doi.org/10.1038/s41598-018-31086-1>

Mitani, Y., Yasuno, R., Futahashi, R., Oakley, T.H. and Ohmiya, Y. (2019). Luciferase gene of a Caribbean fireworm (Syllidae) from Puerto Rico. *Sci. Rep*. 9, 13015. <https://doi.org/10.1038/s41598-019-49538-7>

Müller, W.E.G., Kasueske, M., Wang, X., Schröder, H.C., Wang, Y., Pisignano, D. and Wiens, M. (2009). Luciferase a light source for the silica-based optical waveguides (spicules) in the demosponge *Suberites domuncula*. *Cell. Mol. Life Sci*. 66, 537. <https://doi.org/10.1007/s00018-008-8492-5>

Nakajima, Y., Kobayashi, K., Yamagishi, K., Enomoto, T. and Ohmiya, Y. (2004). cDNA cloning and characterization of a secreted luciferase from the luminous Japanese ostracod, *Cypridina noctiluca*. *Biosci. Biotechnol. Biochem*. 68(3), 565-570. <https://doi.org/10.1271/bbb.68.565>

Nakamura, H., Kishi, Y., Shimomura, O., Morse, D. and Hastings, J. W. (1989). Structure of dinoflagellate luciferin and its enzymic and nonenzymic air-oxidation products. *J. Am. Chem. Soc.* 111(19), 7607-7611. <https://doi.org/10.1021/ja00201a050>

Natashin, P.V., Ding, W., Eremeeva, E.V., Markova, S.V., Lee, J., Vysotski, E.S. and Liu, Z.J. (2014). Structures of the Ca2+-regulated photoprotein obelin Y138F mutant before and after bioluminescence support the catalytic function of a water molecule in the reaction. *Acta Crystallogr., Sect. D: Biol. Crystallogr*. 70(3), 720-732. <https://doi.org/10.1107/S1399004713032434>

Nelson, E.J., Tunsjø, H.S., Fidopiastis, P.M., Sørum, H. and Ruby, E.G. (2007). A novel *lux* operon in the cryptically bioluminescent fish pathogen *Vibrio salmonicida* is associated with virulence. *Appl. Environ. Microbiol*. 73(6), 1825-1833. <https://doi.org/10.1128/AEM.02255-06>

Nicolas, M.-T., Bassot, J.-M. and Shimomura, O. (1982). Polynoidin: a membrane photoprotein isolated from the bioluminescent system of scale-worms. *Photochem. Photobiol*. 35(2), 201-207. <https://doi.org/10.1111/j.1751-1097.1982.tb03832.x>

Oba, Y., Tsuduki, H., Kato, S.-I., Ojika, M. and Inouye, S. (2004). Identification of the luciferin-luciferase system and quantification of coelenterazine by Mass Spectrometry in the deep-sea luminous ostracod *Conchoecia pseudodiscophora*. *ChemBioChem*. 5(11), 1495-1499. <https://doi.org/10.1002/cbic.200400102>

Oba, Y., Sato, M., Ohta, Y. and Inouye, S. (2006). Identification of paralogous genes of firefly luciferase in the Japanese firefly, *Luciola curciata*. *Gene*. 368, 53-60. <https://doi.org/10.1016/j.gene.2005.10.023>

Oba, Y., Kato, S.-I., Ojika, M. and Inouye, S. (2009). Biosynthesis of coelenterazine in the deep-sea copepod, *Metridia pacifica*. *Biochem. Biophys. Res. Commun*. 390(3), 684-688. <https://doi.org/10.1016/j.bbrc.2009.10.028>

Oba, Y., Furuhashi, M. and Inouye, S. (2010a). Identification of a functional luciferase gene in the non-luminous diurnal firefly, *Lucidina biplagiata*. *Insect Mol. Biol*. 19(6), 737-743. <https://doi.org/10.1111/j.1365-2583.2010.01027.x>

Oba, Y., Kumazaki, M. and Inouye, S. (2010b). Characterization of luciferases and its paralogue in the Panamanian luminous click beetle *Pyrophorus angustus*: a click beetle luciferase lacks the fatty acyl-CoA synthetic activity. *Gene*. 452(1), 1-6. <https://doi.org/10.1016/j.gene.2009.12.001>

Oba, Y., Yoshida, M., Shintani, T., Furuhashi, M. and Inouye, S. (2012). Firefly luciferase genes from the subfamilies Psilocladinae and Ototretinae (Lampyridae, Coleoptera). *Comp. Biochem. Physiol. B., Biochem. Mol. Biol*. 161(2), 110-116. <https://doi.org/10.1016/j.cbpb.2011.10.001>

Ohmiya, Y., Ohba, N., Toh, H. and Tsujii, F.I. (1995). Cloning, expression and sequence analysis of cDNA for the luciferases from the Japanese fireflies, *Pyrocoelia tniyako* and *Hoturia parvula*. *Photochem. Photobiol*. 62(2), 309-313. <https://doi.org/10.1111/j.1751-1097.1995.tb05273.x>

Ohmiya, Y., Sumiya, M., Viviani, V.R. and Ohba, N. (2000). Comparative aspects of a luciferase molecule from the Japanese luminous beetle, *Rhagophthalmus ohbai*. *Sci. Rep. Yokosuka City Mus*. 47, 31-38.

Ohtsuka, H., Rudie, N.G. and Wampler, J.E. (1976). Structural identification and synthesis of luciferin from the bioluminescent earthworm, *Diplocardia longa*. *Biochem*. 15(5), 1001-1004. <https://doi.org/10.1021/bi00650a009>

Okamoto, O.K., Liu, L., Robertson, D.L. and Hasting, J.W. (2001). Members of a dinoflagellate luciferase gene family differ in synonymous substitution rates. *Biochem*. 40(51), 15862-15868. <https://doi.org/10.1021/bi011651q>

Pes, O., Midlik, A., Schlaghamersky, J., Zitnan, M. and Taborsky, P. (2016). A study on bioluminescence and photoluminescence in the earthworm *Eisenia lucens*. *Photochem. Photobiol. Sci.* 15(2), 175–180. <https://doi.org/10.1039/C5PP00412H>

Petushkov, V.N., Dubinnyi, M.A., Tsarkova, A.S., Rodionova, N.S., Baranov, M.S., Kublitski, V.S., Shimomura, O. and Yampolsky, I.V. (2014). A novel type of luciferin from the Siberian luminous earthworm *Fridericia heliota*: structure elucidation by spectral studies and total synthesis. *Angew. Chem. Int. Ed*. 126(22), 5672-5674; <https://doi.org/10.1002/anie.201400529>

Plyuscheva, M. and Martin, D. (2009). On the morphology of elytra as luminescent organs in scale‐worms (Polychaeta, Polynoidae). *Zoosymposia.* 2, 379-389. <https://doi.org/10.11646/zoosymposia.2.1.26>

Powers, M.L., McDermott, A.G., Shaner, N.C. and Haddock, S.H.D. (2013). Expression and characterization of the calcium-activated photoprotein from the ctenophore *Bathocyroe fosteri*: insights into light-sensitive photoproteins. *Biochem. Biophys. Commun.* 431(2), 360-366. <https://doi.org/10.1016/j.bbrc.2012.12.026>

Purtov, K.V., Petushkov, V.N., Baranov, M.S., Mineev, K.S., Rodionova, N.S., Kaskova, Z.M., et al. (2015). The chemical basis of fungal bioluminescence. *Angewandte Chemie.* 127(28), 8242-8246. <https://doi.org/10.1002/ange.201501779>

Rawat, R. and Deheyn, D.D. (2016). Evidence that ferritin is associated with light production in the mucus of the marine worm *Chaetopterus*. *Sci. Rep.* 6(1), 1-14. <https://doi.org/10.1038/srep36854>

Rees, J.F., Thompson, E.M., Baguet, F. and Tsuji, F.I. (1990). Detection of coelenterazine and related luciferase activity in the tissues of the luminous fish, *Vinciguerria attenuate*. *Comp. Biochem. Physiol. A, Physiol.* 96A(3), 425-430. <https://doi.org/10.1016/0300-9629(90)90107-4>

Rodionova, N.S., Bondar, V.S. and Petushkov, V.N. (2003). ATP is a cosubstrate of the luciferase of the earthworm *Fridericia heliota* (Annelida: Clitellata: Oligochaeta: Enchytraeidae). *Doklady Biochemistry and Biophysics*. 392, 253-255. <https://doi.org/10.1023/a:1026134628735>

Sala-Newby, G.B., Thomson, C.M. and Campbell, A.K. (1996). Sequence and biochemical similarities between the luciferases of the glow-worm *Lampyris noctiluca* and the firefly *Photinus pyralis*. *Biochem. J*. 313(3), 761-767. <https://doi.org/10.1042/bj3130761>

Schnitzler, C.E., Pang, K., Powers, M.L. *et al.* (2012). Genomic organization, evolution, and expression of photoprotein and opsin genes in *Mnemiopsis leidyi*: a new view of ctenophore photocytes. *BMC Biol.* 10**,** 107. <https://doi.org/10.1186/1741-7007-10-107>

Schultz, D.T., Kotlobay, A.A., Ziganshin, R., Bannikov, A., Markina, N.M., Chepurnyh, T.V., Shakhova, E.S., Palkina, K., Haddock, S.H.D., Yampolsky, I.V., Oba, Y. (2018) Luciferase of the Japanese syllid polychaete *Odontosyllis umdecimdonta*. *Biochem. Biophys. Res. Commun.* 502(3), 318-323. <https://doi.org/10.1016/j.bbrc.2018.05.135>

Sharpe, M.L., Dearden, P.K., Gimenez, G. and Krause, K.L. (2015). Comparative RNA seq analysis of the New Zealand glowworm *Arachnocampa luminosa* reveals bioluminescence-related genes. *BMC Genomics*. 16, 825. <https://doi.org/10.1186/s12864-015-2006-2>

Shimomura, O., Goto, T. and Hirata, Y. (1957). Crystalline *Cypridina* luciferin. *Bull. Chem. Soc. Jpn*. 30(8), 929-933. <https://doi.org/10.1246/bcsj.30.929>

Shimomura, O., Johnson, F.H. and Saiga, Y. (1963). Partial purification and properties of the *Odontosyllis* luminescence system. *J. Cell. Comp. Physiol.* 61, 275-92. <https://doi.org/10.1002/jcp.1030610309>

Shimomura, O. and Johnson, F.H. (1968). Purification and properties of the luciferase and of a protein cofactor in the bioluminescence system of *Latia neritoides*. *Biochem*. 7(7), 2574-2580. <https://doi.org/10.1021/bi00847a019>

Shimomura, O., Johnson, F.H. and Kohama, Y. (1972). Reactions involved in bioluminescence systems of limpet (*Latia neritoides*) and luminous bacteria. *Proc. Natl. Acad. Sci. U. S. A*. 69(8), 2086-2089. <https://doi.org/10.1073/pnas.69.8.2086>

Shimomura, O. and Johnson, F.H. (1979). Comparison of the amounts of key components in the bioluminescence systems of various coelenterates. *Comp. Biochem. Physiol. B, Comp. Biochem*. 64(1), 105-107. <https://doi.org/10.1016/0305-0491(79)90191-3>

Shimomura, O., Inoue, S., Johnson, F.H. and Haneda, Y. (1980). Widespread occurrence of coelenterazine in marine bioluminescence. *Comp. Biochem. Physiol. B, Comp. Biochem*. 65(2), 435-437. <https://doi.org/10.1016/0305-0491(80)90044-9>

Shimomura, O. (1984). Porphyrin chromophores in *Luminodesmus* photoprotein. *Comp. Biochem. Physiol.* 79B, 565–567. <https://doi.org/10.1016/0305-0491(84)90367-5>

Shimomura, O. (1986). Bioluminescence of the brittle star *Ophiopsila californica*. *Photochem. Photobiol*. 44(5), 671-674. <https://doi.org/10.1111/j.1751-1097.1986.tb04724.x>

Shimomura, O. and Flood, P.R. (1998). Luciferase of the Scyphozoan Medusa *Periphylla periphylla*. *The Biological Bulletin*. **194**(3), 244-251. <https://doi.org/10.2307/1543094>

Shimomura, O., Flood, P.R., Inouye, S., Bryan, B., Shimomura, A. (2001) Isolation and properties of the luciferase stored in the ovary of the Scyphozoan Medusa *Periphylla periphylla*. *Biol. Bull*. 201(3), 339-347. <https://doi.org/10.2307/1543612>

Shimomura, O. (2006). Bioluminescence: chemical principles and methods. World Scientific.

Shimomura, O. (2008). The photoproteins. *Protein Science Encyclopedia: Online*. 1-23. <https://doi.org/10.1002/9783527610754.mp12>

Silva Neto, A.J., Scorsato, V., Arnoldi, F.G.C. and Viviani, V.R. (2009). *Pyrearinus termitilluminans* larval click beetle luciferase: active site properties, structure and function relationships and comparison with other beetle luciferase. *Photochem. Photobiol. Sci*. 8(12), 1748. <https://doi.org/10.1039/b9pp00053d>

Stepanyuk, G.A., Liu, Z.J., Burakova, L.P., Lee, J., Rose, J., Vysotski, E.S. and Wang, B.C. (2013). Spatial structure of the novel light-sensitive photoprotein berovin from the ctenophore *Beroe abyssicola* in the Ca2+-loaded apoprotein conformation state. *BBA-Proteins Proteom*. 1834(10), 2139-2146. <https://doi.org/10.1016/j.bbapap.2013.07.006>

Stolz, U., Velez, S., Wood, K.V., Wood, M. and Feder, J.L. (2003). Darwinian natural selection for orange bioluminescent color in a Jamaican click beetle. *Proc. Natl. Acad. Sci. U. S. A*. 100(25), 14955-14959. <https://doi.org/10.1073/pnas.2432563100>

Szittner, R. and Meighen, E. (1990). Nucleotide sequence, expression, and properties of luciferase coded by *lux* genes from a terrestrial bacterium. *J. Biol. Chem*. 265, 16581-16587.

Takahashi, H. and Isobe, M. (1994). Photoprotein of luminous squid, *Symplectoteuthis oualaniensis* and reconstruction of the luminous system. *Chem. Lett*. 23(5), 843-846. <https://doi.org/10.1246/cl.1994.843>

Takenaka, Y., Masuda, H., Yamaguchi, A., Nishikawa, S., Shigeri, Y., Yoshida, Y. and Mizuno, H. (2008). Two forms of secreted and thermostable luciferases from the marine copepod crustacean, *Metridia pacifica*. *Gene*. 425(1-2), 28-35. <https://doi.org/10.1016/j.gene.2008.07.041>

Takenaka, Y., Yamaguchi, A., Tsuruoka, N., Torimura, M., Gojobori, T. and Shigeri, Y. (2012). Evolution of bioluminescence in marine copepods. *Mol. Biol. Evol*. 29(6), 1669-1681. <https://doi.org/10.1093/molbev/mss009>

Takenaka, Y., Noda-Ogura, A., Imanishi, T., Yamaguchi, A., Gojobori, T. and Shigeri, Y. (2013). Computational analysis and functional expression of ancestral copepod luciferase. *Gene*. 528(2), 201-205. <https://doi.org/10.1016/j.gene.2013.07.011>

Tatsumi, H., Kajiyama, N. and Nakano, E. (1992). Molecular cloning and expression in *Escherichia coli* of a cDNA clone encoding luciferase of a firefly, *Luciola lateralis*. *BBA-Struct. Expr*. 1131(2), 161-165. <https://doi.org/10.1016/0167-4781(92)90071-7>

Tessler, M., Gaffney, J.P., Crawford, J.M., Trautman, E., Gujarati, N.A., Alatalo, P., Pieribone, V.A. and Gruber, D.F. (2018). Luciferin production and luciferase transcription in the bioluminescent copepod *Metridia lucens*. *PeerJ*. 6, e5506. <https://doi.org/10.7717/peerj.5506>

Tessler, M. Gaffney, J.P., Oliveira, G.A., Guarnaccia, A., Dobi, K.C., Gujarati, N.A., Galbraith, M., Mirza, J.D., Sparks, J.S., Pieribone, V.A., Wood, R.J. and Gruber, D.F. (2020). A putative chordate luciferase from a cosmopolitan tunicate indicates convergent bioluminescence evolution across phyla. *Sci. Rep*. 10, 17724. <https://doi.org/10.1038/s41598-020-73446-w>

Titushin, M.S., Markova, S.V., Frank, L.A., Malikova, N.P., Stepanyuk, G.A., Lee, J. and Vysotski, E.S. (2008). Coelenterazine-binding protein of *Renilla muelleri*: cDNA cloning, overexpression, and characterization as a substrate of luciferase. *Photochem. Photobiol. Sci.* 7(2), 189-196. <https://doi.org/10.1039/B713109G>

Titushin, M.S., Feng, Y., Stepanyuk, G.A., Li, Y., Markova, S.V., Golz, S., Wang, B.-C., Lee, J., Wang, J., Vysotski, E.S. and Liu, Z.-J. (2010). NMR-derived topology of a GFP-photoprotein energy transfer complex. *J. Biol. Chem*. 285, 40891-40900. <https://doi.org/10.1074/jbc.M110.133843>

Thompson, E.M., Nagata, S. and Tsuji, F.I. (1989). Cloning and expression of cDNA for the luciferase from the marine ostracod *Vargula hilgendorfii*. *Proc. Natl. Acad. Sci. U. S. A*. 86(17), 6567-6571. <https://doi.org/10.1073/pnas.86.17.6567>

Thompson, C., Herring, P.J. and Campbell, A.K. (1995a). Coelenterazine distribution and luciferase characteristics in oceanic decapod crustaceans. *Mar. Biol*. 124, 197-207. <https://doi.org/10.1007/BF00347123>

Thompson, C., Herring, P.J. and Campbell, A.K. (1995b). Evidence for de novo biosynthesis of coelenterazine in the bioluminescent midwater shrimp, *Systellaspis debilis* C. *J. Mar. Biol. Assoc. U. K*. 75(1), 165-171. <https://doi.org/10.1017/S0025315400015277>

Thompson, C., Herring, P.J. and Campbell, A.K. (1997). The widespread occurrence and tissue distribution of the imidazolopyrazine luciferins. *J. Biolum. Chemilum*. 12(2), 87-91. [https://doi.org/10.1002/(SICI)1099-1271(199703/04)12:2<87::AID-BIO438>3.0.CO;2-8](https://doi.org/10.1002/(SICI)1099-1271(199703/04)12:2%3c87::AID-BIO438%3e3.0.CO;2-8)

Tsuji, F.I., Barnes, A.T. and Case, J.F. (1972). Bioluminescence in the marine teleost, *Porichthys notatus*, and its induction in a non-luminous form by *Cypridina* (Ostracod) luciferin. *Nature*. 237, 515-516. <https://doi.org/10.1038/237515a0>

Tsujii, F.I. (2002). Bioluminescence reaction catalyzed by membrane-bound luciferase in the “firefly squid”, *Watasenia scintillans*. *BBA-Biomembranes*. 1564(1), 189-197. <https://doi.org/10.1016/S0005-2736(02)00447-9>

Tsutomu, M., Hiroki, T. and Eiichi, N. (1989). Cloning and sequence analysis of cDNA for luciferase of a Japanese firefly, *Luciola cruciata*. *Gene*. 77(2), 265-270. <https://doi.org/10.1016/0378-1119(89)90074-7>

Urbanczyk, H., Ast, J.C., Kaeding, A.J., Oliver, J.D. and Dunlap, P.V. (2008). Phylogenetic analysis of the incidence of *lux* gene horizontal transfer in Vibrionaceae. *J. Bacteriol*. 190(10), 3494-3504. <https://doi.org/10.1128/JB.00101-08>

Urbanczyk, H., Furukawa, T., Yamamoto, Y. and Dunlap, P.V. (2012). Natural replacement of vertically inherited *lux-rib* genes of *Photobacterium aquimaris* by horizontally acquired homologues. *Environ. Microbiol. Rep*. 4(4), 412-416. <https://doi.org/10.1111/j.1758-2229.2012.00355.x>

Verhaegen, M. and Christopoulos, T.K. (2002). Recombinant *Gaussia* luciferase. Overexpression, purification, and analytical application of a bioluminescent reporter for DNA hybridization. *Anal. Chem*. 74(17), 4378-4385. <https://doi.org/10.1021/ac025742k>

Viviani, V.R., Bechara, E.J.H. and Ohmiya, Y. (1999a). Cloning, sequence analysis, and expression of active *Phrixothrix* railroad-worms luciferases: relationship between bioluminescence spectra and primary structures. *Biochem*. 38(26), 8271-8279. <https://doi.org/10.1021/bi9900830>

Viviani, V.R., Silva, J.R., Perez, G.L.O., Santelli, R.V., Bechara, E.J.H. and Reinach, F.C. (1999b). Cloning and molecular characterization of the cDNA for the Brazilian larval click-beetle *Pyrearinus termitilluminans* luciferase. *Photochem. Photobiol*. 70(2), 254-260. <https://doi.org/10.1111/j.1751-1097.1999.tb07997.x>

Viviani, V.R., Hastings J.W. and Wilson, T. (2002). Two bioluminescent Diptera: The North American *Orfelia fultoni* and the Australian *Arachnocampa flava*. Similar niche, different bioluminescence systems. *Photochem. Photobiol*. 75(1), 22-27. <https://doi.org/10.1562/0031-8655(2002)0750022TBDTNA2.0.CO2>

Viviani, V.R., Arnoldi, F.G.C., Brochetto-Braga, M. and Ohmiya, Y. (2004). Cloning and characterization of the cDNA for the Brazilian *Cratomorphus distinctus* larval firefly luciferase: similarities with European *Lampyris noctiluca* and Asiatic *Pyrocoelia* luciferases. *Comp. Biochem. Physiol. B, Biochem. Mol. Biol*. 139(2), 151-156. <https://doi.org/10.1016/j.cbpc.2004.05.012>

Viviani, V.R., Amaral, D.T., Prado, R. and Arnoldi, F.G.C. (2011). A new blue-shifted luciferase from the Brazilian *Amydetes fanestratus* (Coleoptera: Lampyridae) firefly: molecular evolution and structural/functional properties. *Photochem. Photobiol. Sci*. 10(12), 1879-1886. <https://doi.org/10.1039/C1PP05210A>

Viviani, V.R., Silva, J.R., Amaral, D.T., Bevilaqua, V.R., Abdalla, F.C., Branchini, B.R. and Johnson, C.H. (2020). A new brilliantly blue-emitting luciferin-luciferase system from *Orfelia fultoni* and Keroplatinae (Diptera). *Sci. Rep*. 10, 9608. <https://doi.org/10.1038/s41598-020-66286-1>

Vysotski, E.S., Liu, Z.J., Rose, J., Wang, B.C. and Lee, J. (1999). Preparation and preliminary study of crystals of the recombinant calcium-regulated photoprotein obelin from the bioluminescent hydroid *Obelia longissima*. *Acta Crystallogr., Sect. D, Biol. Crystallogr*. 55(11), 1965-1966. <https://doi.org/10.1107/S090744499901182>

Vysotski, E.S., Liu, Z.J., Markova, S.V., Blinks, J.R., Deng, L., Frank, L.A., Herko, M., Malikova, N.P., Rose, J.P., Wang, B.C. and Lee, J. (2003). Violet bioluminescence and fast kinetics from W92F obelin: structure-based proposals for the bioluminescence triggering and identification of the emitting species. *Biochem*. 42, 6013-6024. <https://doi.org/10.1021/bi027258h>

Wampler, J.E. and Jamieson, B.G.M. (1980). Earthworm bioluminescence: Comparative physiology and biochemistry. *Comp. Biochem. Physiol. B, Comp. Biochem.* 66(1), 43–50.<https://doi.org/10.1016/0305-0491(80)90081-4>

Wampler, J.E. (1982). The bioluminescent system of *Microscolex phosphoreus* and its similarities to those of other bioluminescent earthworms (Oligochaeta). *Comp. Biochem. Physiol.* 71A(4), 599-604. <https://doi.org/10.1016/0300-9629(82)90209-2>

Wang, K., Hong, W., Jiao, H. and Zhao, H. (2017). Transcriptome sequencing and phylogenetic analysis of four species of luminescent beetles. *Sci. Rep*. 7, 1814. <https://doi.org/10.1038/s41598-017-01835-9>

Ward, W.W. and Seliger, H.H. (1974). Properties of mnemiopsin and berovin, calcium-activated photoproteins from the ctenophores *Mnemiopsis* sp. and *Beroë ovata*. *Biochem*. 13(7), 1500-1510. <https://doi.org/10.1021/bi00704a028>

Watkins, O.C., Sharpe, M.L., Perry, N.B. and Krause, K.L. (2018). New Zealand glowworm (*Arachnocampa luminosa*) bioluminescence is produced by a firefly-like luciferase but an entirely new luciferin. *Sci. Rep*. 8, 3278. <https://doi.org/10.1038/s41598-018-21298-w>

Wenxin, L., Jun, Z., Shaowei, L., Tong, C., Min, C., Shaojing, L. and Ningshao, X. (2004). Cloning and expression of the aequorin genes from jellyfish *Aequorea* and characterization of aequorins activities. *Acta Oceanol. Sin*. 26(4), 110-117.

Wood, K.V., Lam, Y.A., Seliger, H.H. and McElroy, W.D. (1989). Complementary DNA coding click beetle luciferases can elicit bioluminescence of different colors. *Science*. 244(4905), 700-702. <https://doi.org/10.1126/science.2655091>

Xia, N.S., Luo, W.X., Zhang, J., Xie, X.Y., Yang, H.J., Li, S.W., Chen, M. and Ng, M.H. (2002). Bioluminescence of *Aequorea macrodactyla*, a common jellyfish species in the East China Sea. *Mar. Biotechnol*. 4(2), 155-162. <https://doi.org/10.1007/s10126-001-0081-7>

Ye, L., Buck, L.M., Schaeffer, H.J. and Leach, F.R. (1997). cloning and sequencing of a cDNA for firefly luciferase from *Photuris pennsylvanica*. *BBA- Protein Struct. Mol. Enzymol*. 1339(1), 39-52. <https://doi.org/10.1016/S0167-4838(96)00211-7>

Zhang, E., Imada, C., Kamata, M., Kobayashi, T. and Hamada-Sato, N. (2008). Improved method of protoplast fusion between marine luminescent bacterium and *Escherichia coli* cultivated with fatty acid. *Fish. Sci*. 74, 1290. <https://doi.org/10.1111/j.1444-2906.2008.01654.x>
